# Supplementary material for: Mechanistic insights into neurotransmitter release and presynaptic plasticity from the crystal structure of Munc13-1 C1C2BMUN
Source: eLife journal article supplement (doi:10.7554/elife.22567), 2017-02-08
Supplement: supp [file elife-22567-supp-v1.zip]

Archive with 9 entries (9 files):
- elife_poa_e22567_Figure_1_figure_supplement_4.pdf
- elife_poa_e22567_Figure_8_figure_supplement_2.pdf
- elife_poa_e22567_Figure_8_figure_supplement_1.pdf
- elife_poa_e22567_Figure_8_figure_supplement_3.pdf
- elife_poa_e22567_Figure_1_figure_supplement_5.pdf
- elife_poa_e22567_Figure_1_figure_supplement_2.pdf
- elife_poa_e22567_Figure_1_figure_supplement_1.pdf
- elife_poa_e22567_Figure_1_figure_supplement_3.pdf
- elife_poa_e22567_Figure_3_figure_supplement_1.pdf
