# Supplementary figures and images for: Mechanistic insights into neurotransmitter release and presynaptic plasticity from the crystal structure of Munc13-1 C1C2BMUN
Source: eLife journal article supplement (doi:10.7554/elife.22567), 2017-02-08

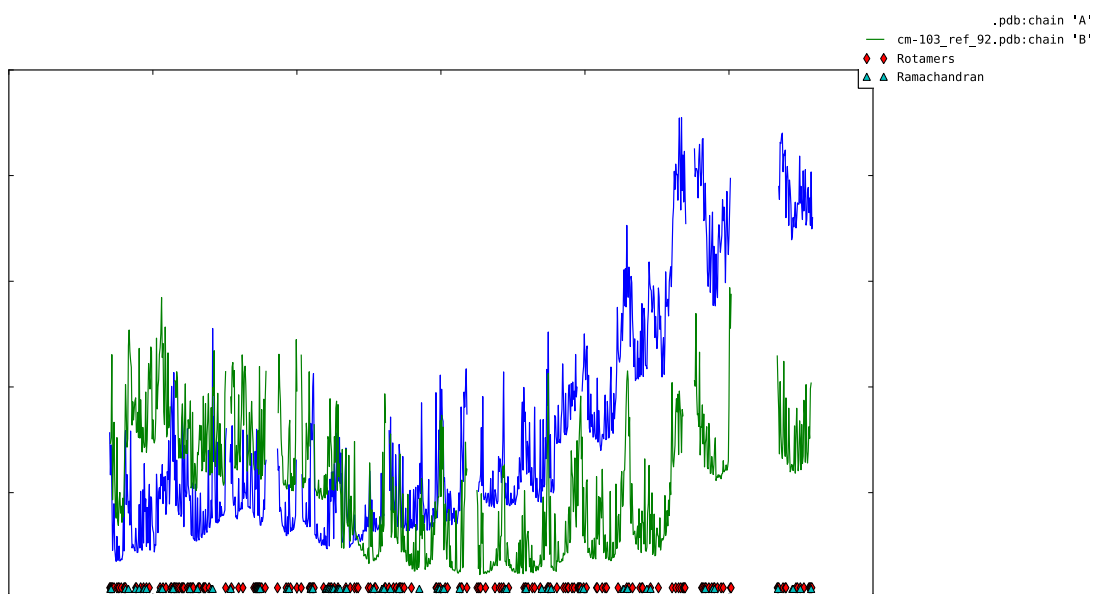

Figure 1 – figure supplement 4  
Xu et al.

Supplement: supp [file elife-22567-supp-v1.zip › elife_poa_e22567_Figure_1_figure_supplement_4.pdf]

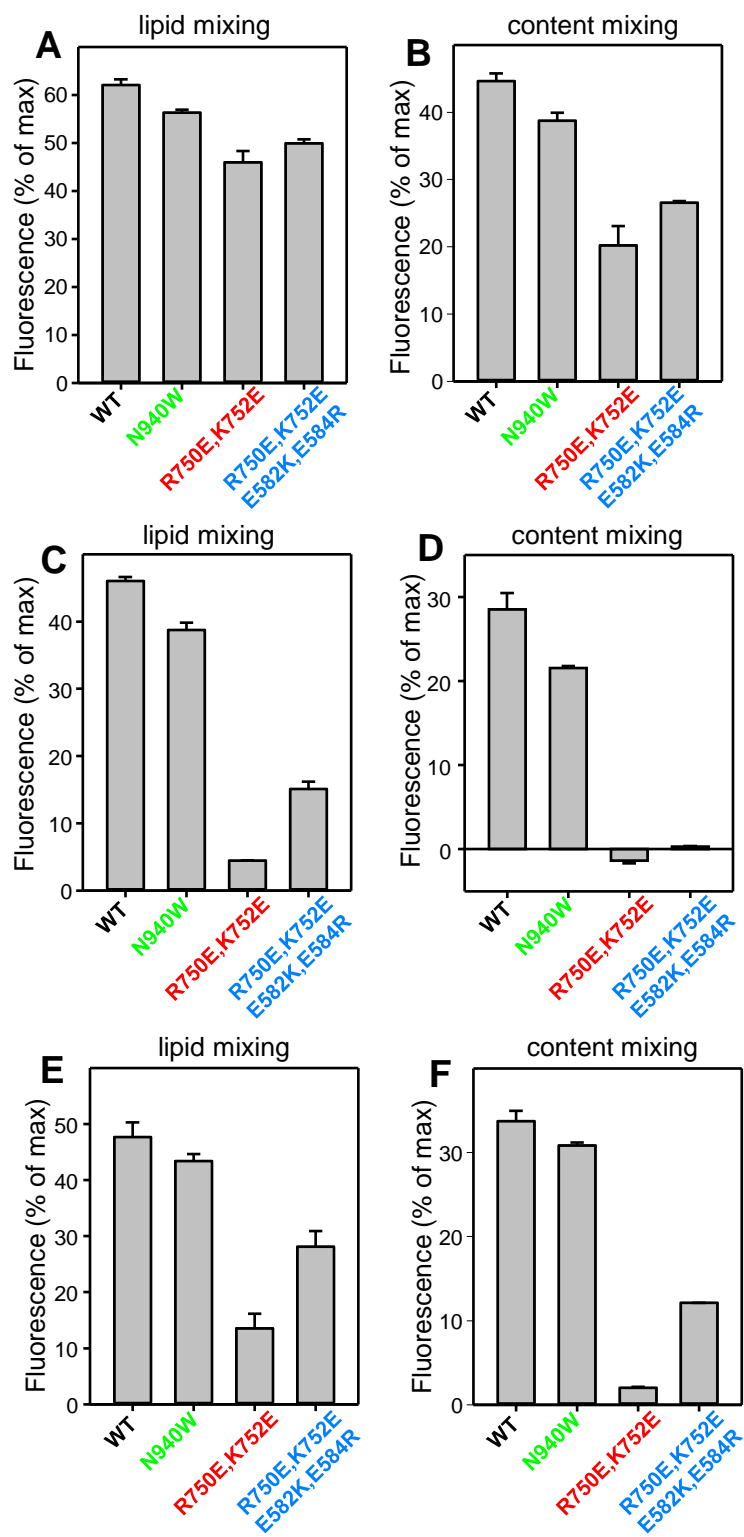

Figure 8 –figure supplement 2  
Xu et al.

Supplement: supp [file elife-22567-supp-v1.zip › elife_poa_e22567_Figure_8_figure_supplement_2.pdf]

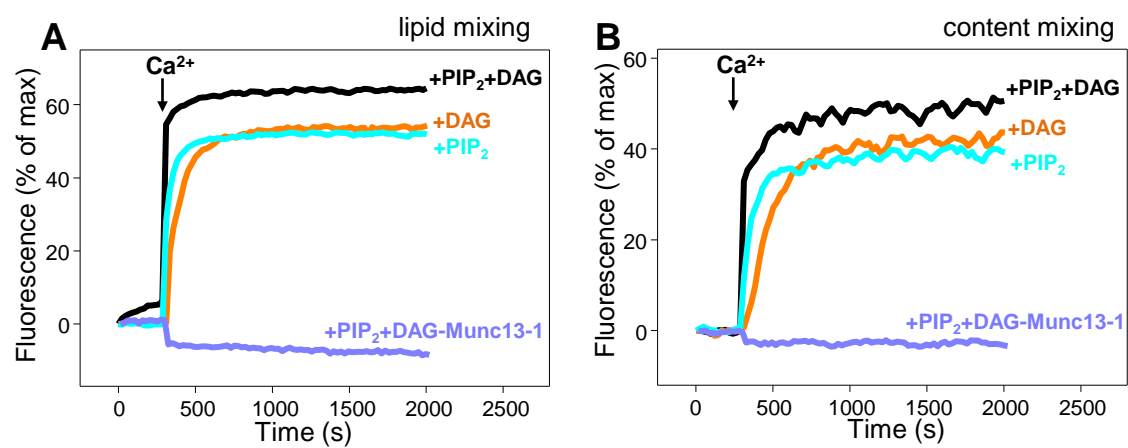

Figure 8 –figure supplement 1  
Xu et al.

Supplement: supp [file elife-22567-supp-v1.zip › elife_poa_e22567_Figure_8_figure_supplement_1.pdf]

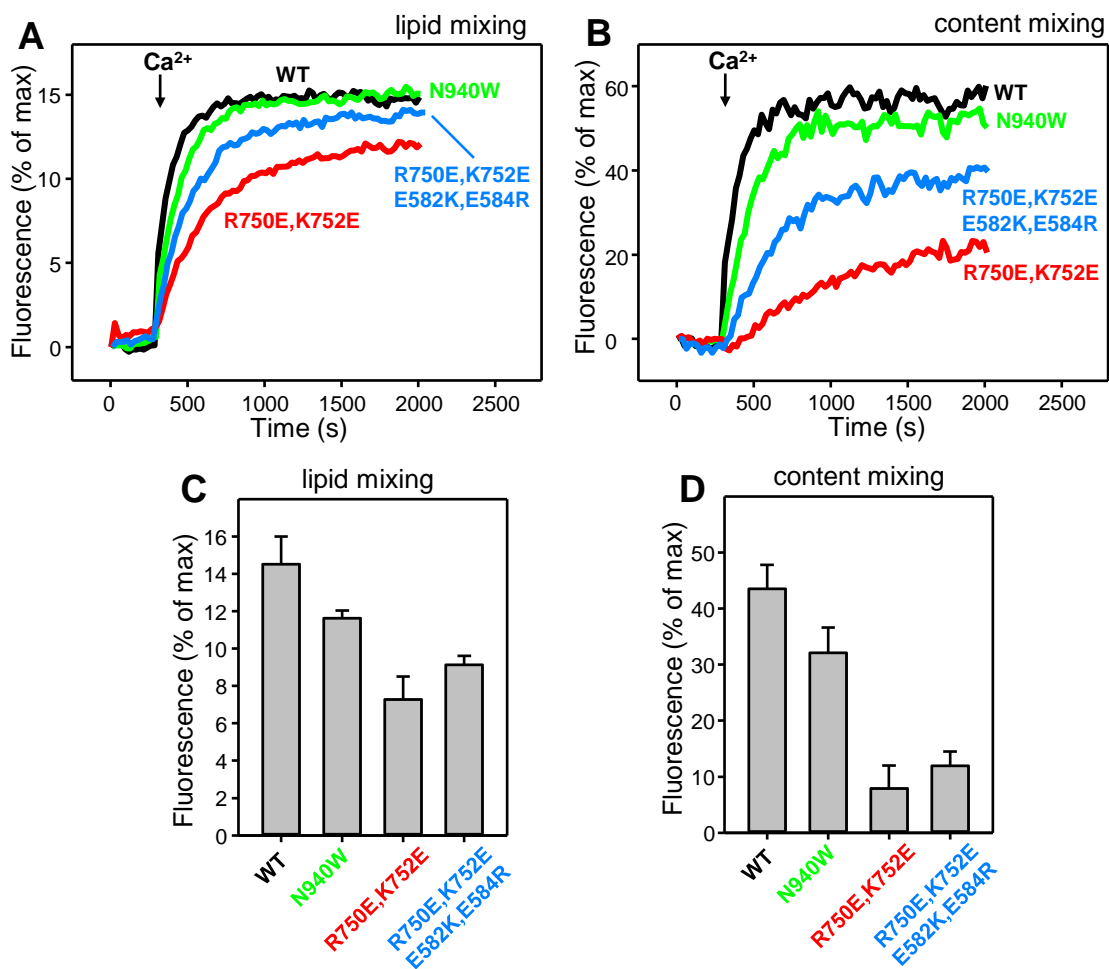

Figure 8 –figure supplement 3  
Xu et al.

Supplement: supp [file elife-22567-supp-v1.zip › elife_poa_e22567_Figure_8_figure_supplement_3.pdf]

**A**

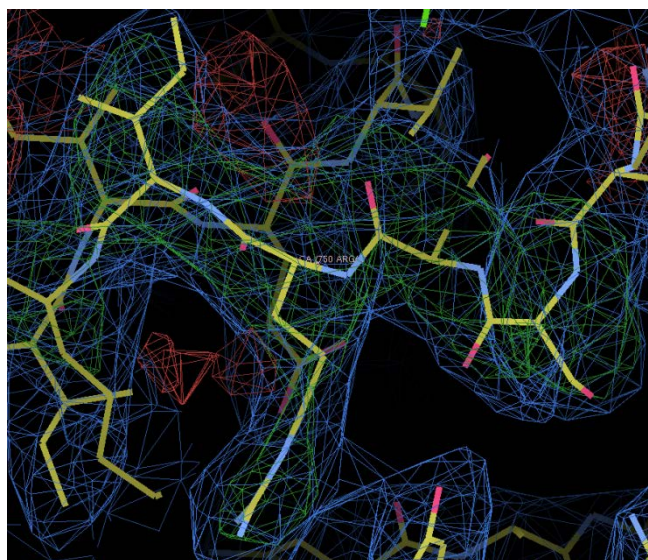

**B**

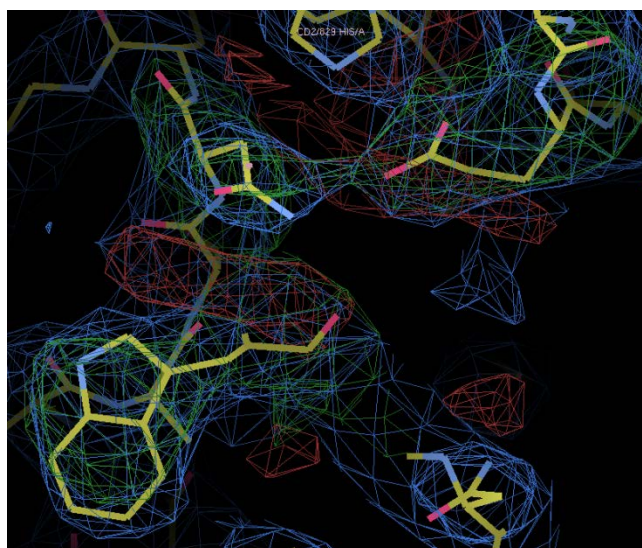

**C**

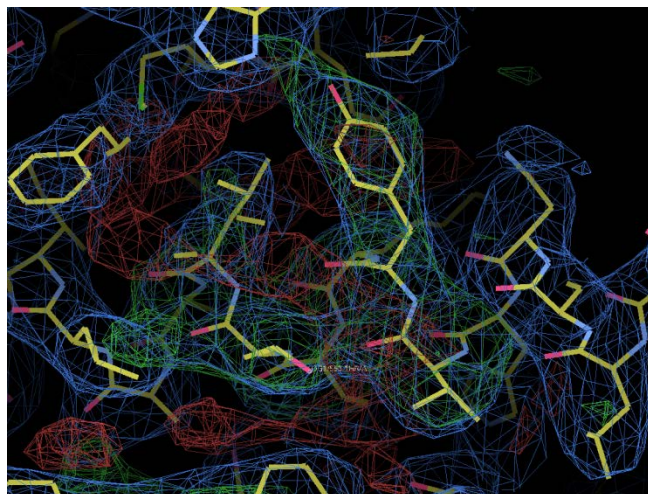

Figure 1 – figure supplement 5  
Xu et al.

Supplement: supp [file elife-22567-supp-v1.zip › elife_poa_e22567_Figure_1_figure_supplement_5.pdf]

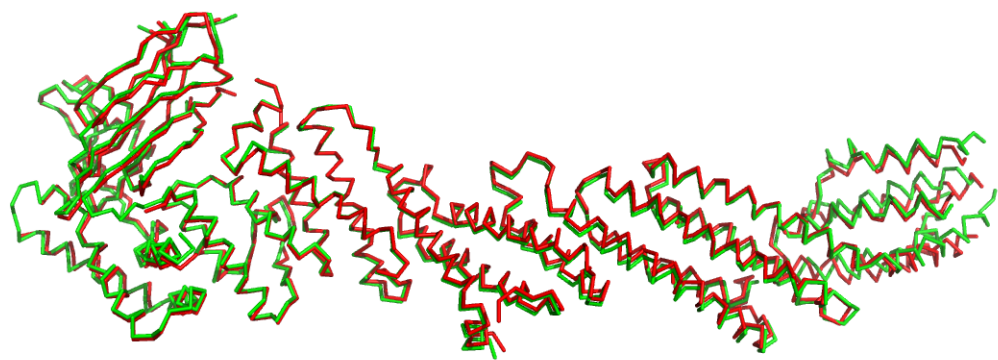

Figure 1 – figure supplement 2  
Xu et al.

Supplement: supp [file elife-22567-supp-v1.zip › elife_poa_e22567_Figure_1_figure_supplement_2.pdf]

**A**

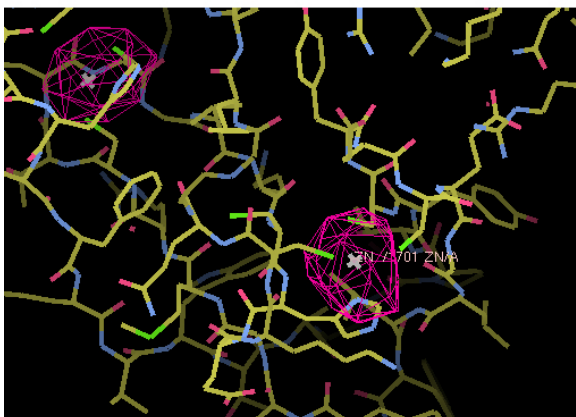

**B**

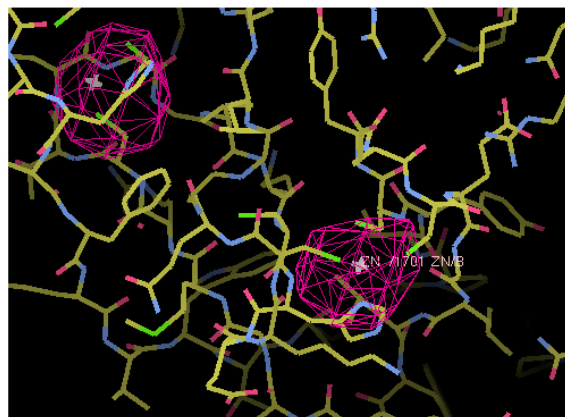

Figure 1 - figure supplement 1  
Xu et al.

Supplement: supp [file elife-22567-supp-v1.zip › elife_poa_e22567_Figure_1_figure_supplement_1.pdf]

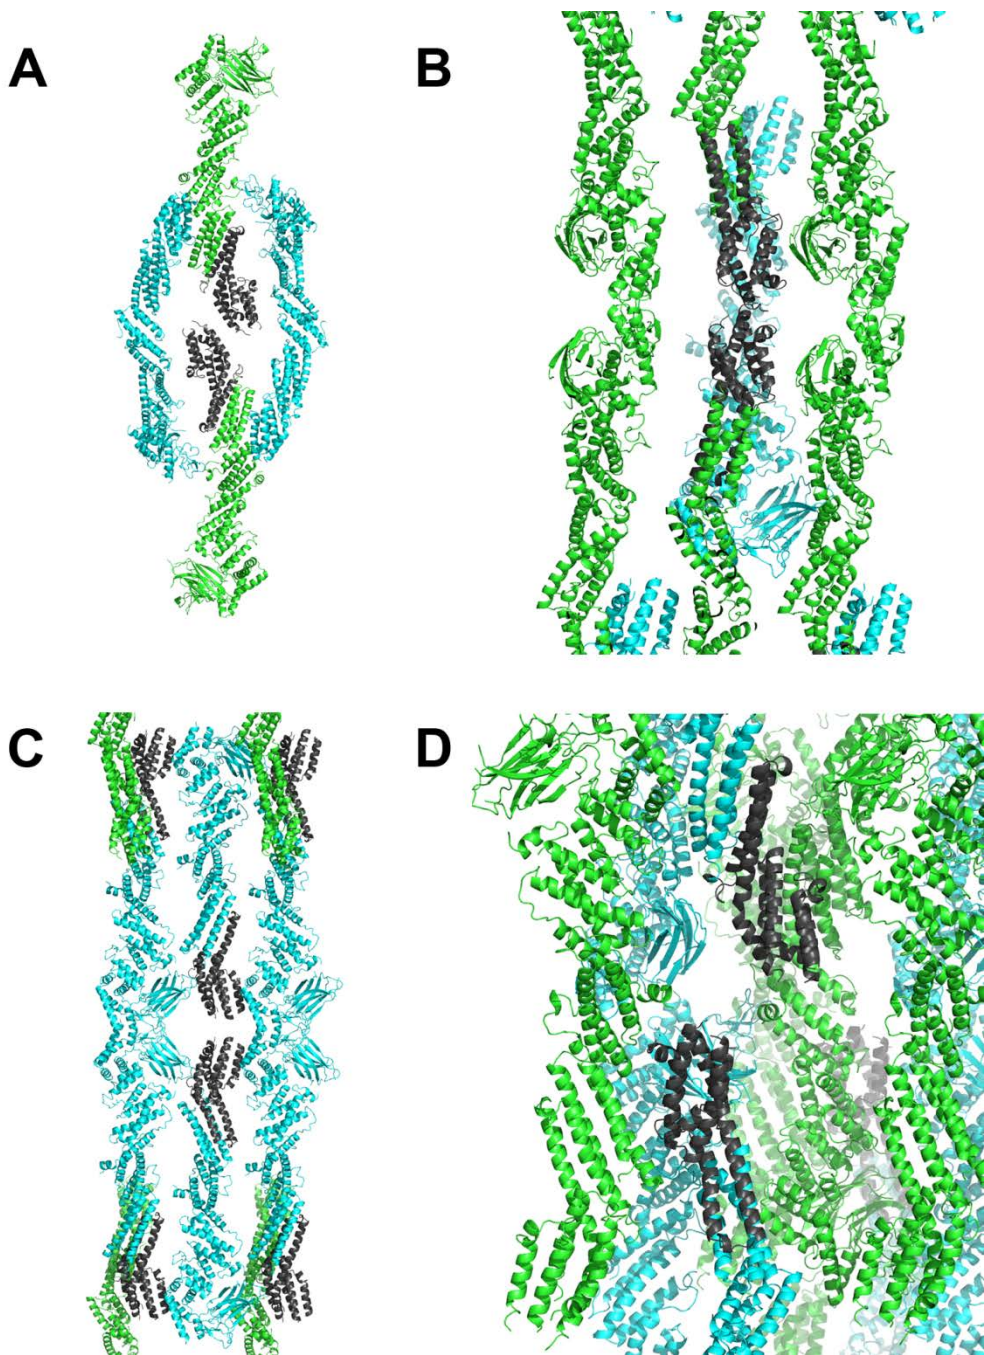

Figure 1 – figure supplement 3  
Xu et al.

Supplement: supp [file elife-22567-supp-v1.zip › elife_poa_e22567_Figure_1_figure_supplement_3.pdf]

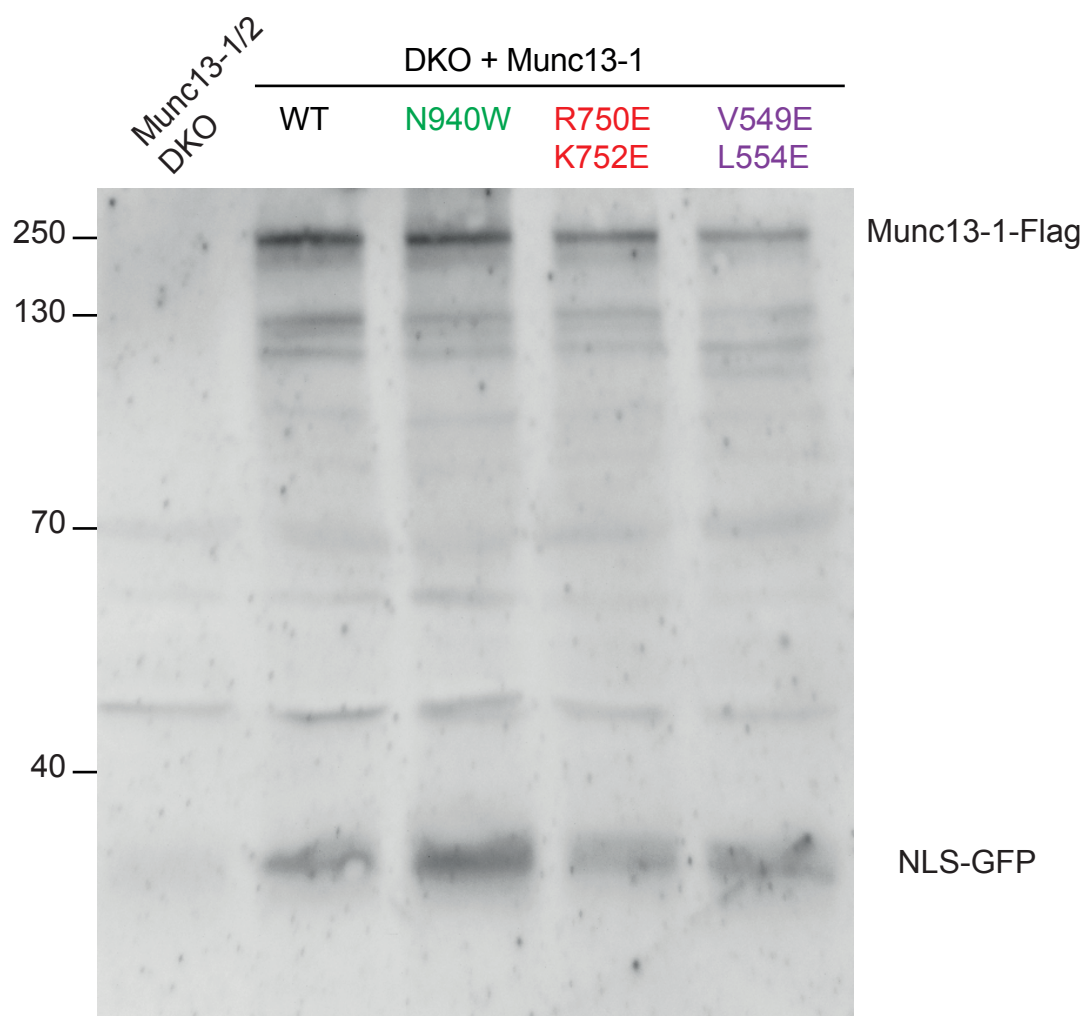

Figure 3 - figure supplement 1  
Xu et al.

Supplement: supp [file elife-22567-supp-v1.zip › elife_poa_e22567_Figure_3_figure_supplement_1.pdf]
